# Supplementary material
Source: PubMed Central journal article supplement (PMC3593132)

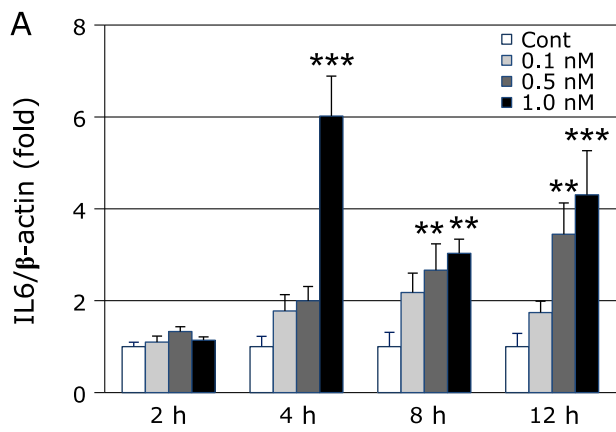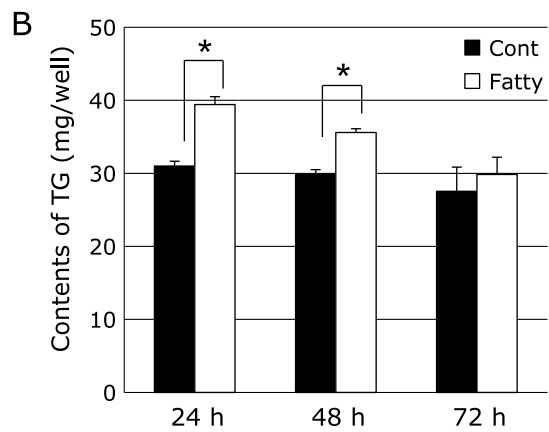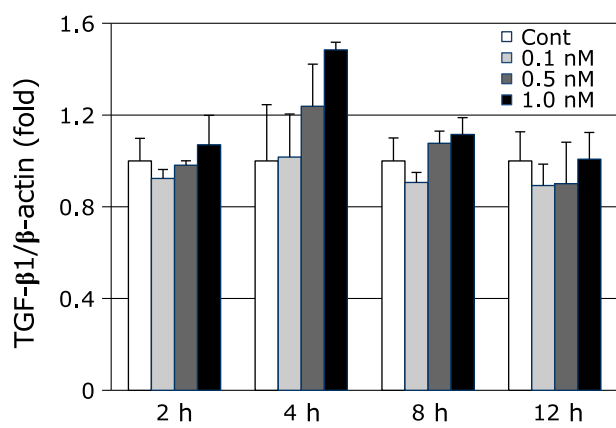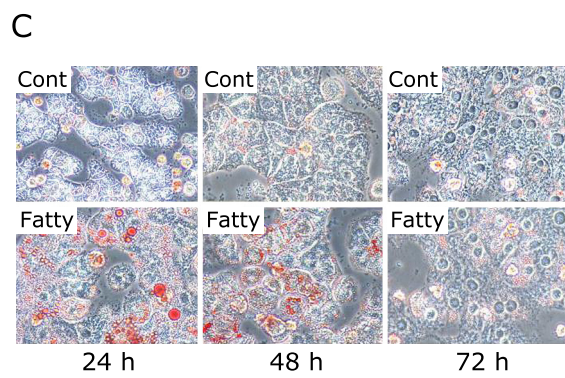

**Supplemental Fig. 1**

Supplement: jcbn12-101s01.pdf [file jcbn12-101s01.pdf]

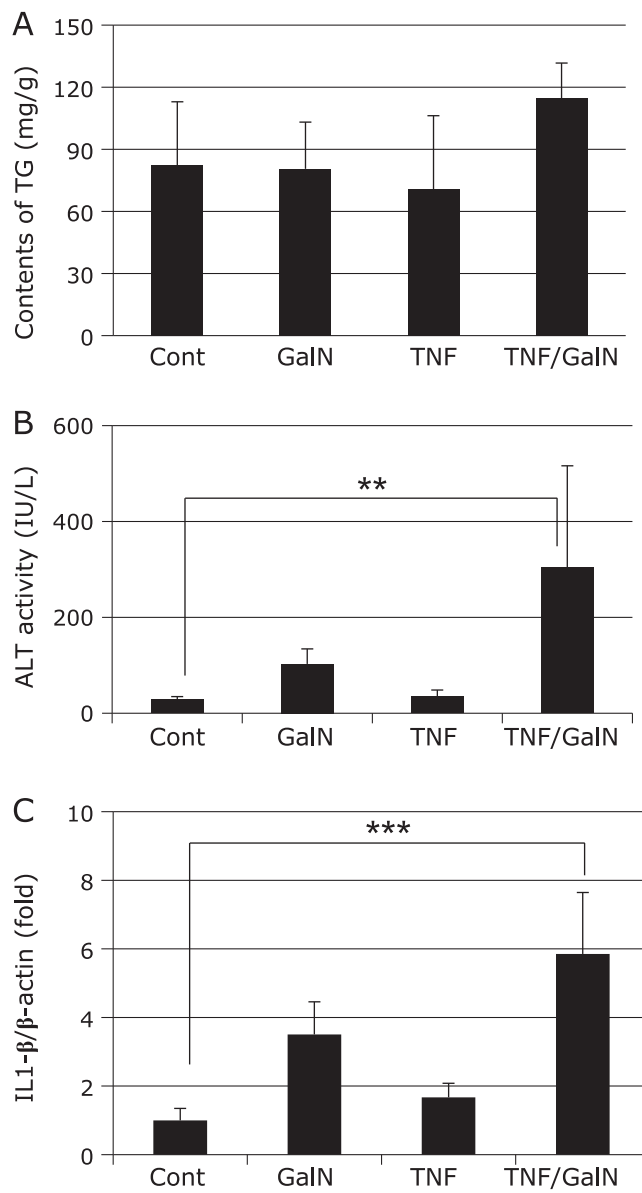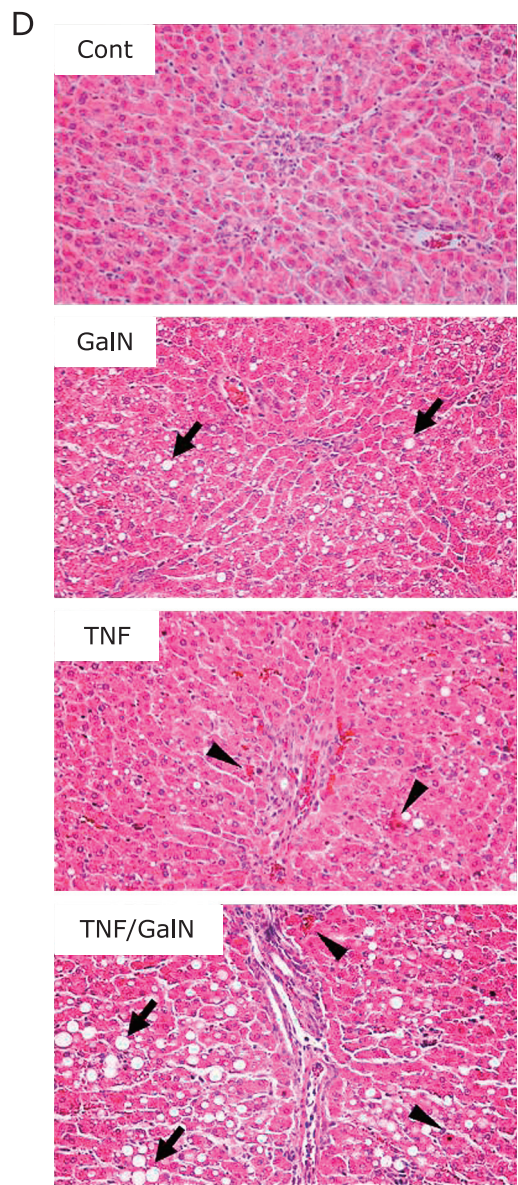

**Supplemental Fig. 2**

Supplement: jcbn12-101s02.pdf [file jcbn12-101s02.pdf]

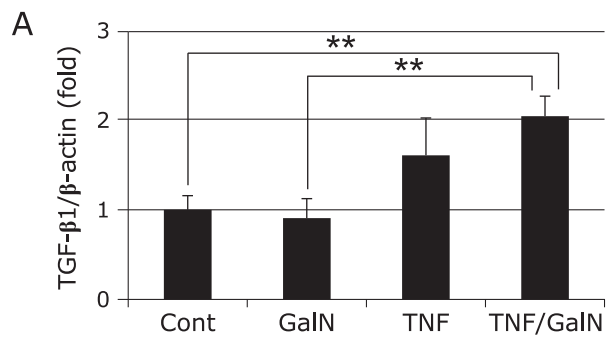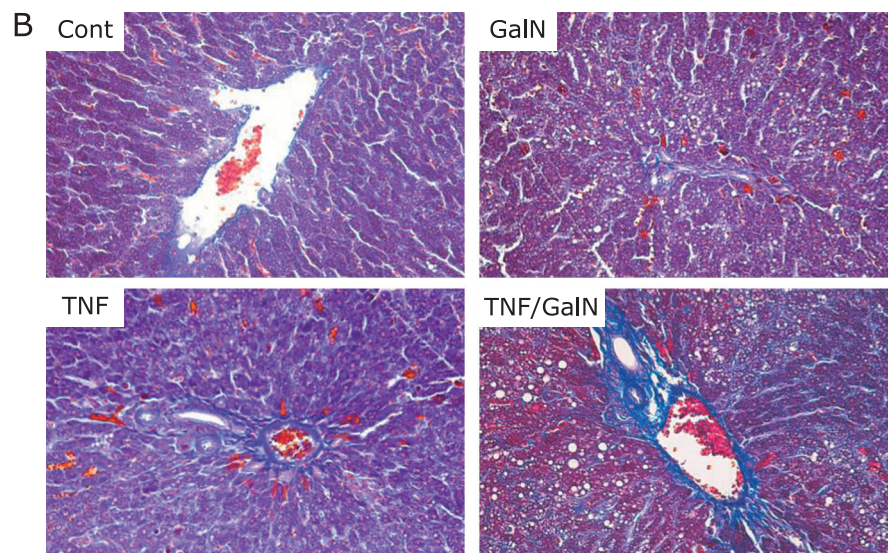

**Supplemental Fig. 3**

Supplement: jcbn12-101s03.pdf [file jcbn12-101s03.pdf]
